# Supplementary material for: Macropinocytosis confers resistance to therapies targeting cancer anabolism
Source: PubMed Central journal article supplement (PMC7048872; doi:10.1038/s41467-020-14928-3), 2020-02-28
Supplement: 41467_2020_14928_MOESM1_ESM.pdf [file 41467_2020_14928_MOESM1_ESM.pdf]

Macropinocytosis confers resistance to therapies  
targeting cancer anabolism

V. Jayashankar and A.L. Edinger

Supplementary Figures 1-8 with legends

# Supplementary Fig. 1 - Related to Fig. 1

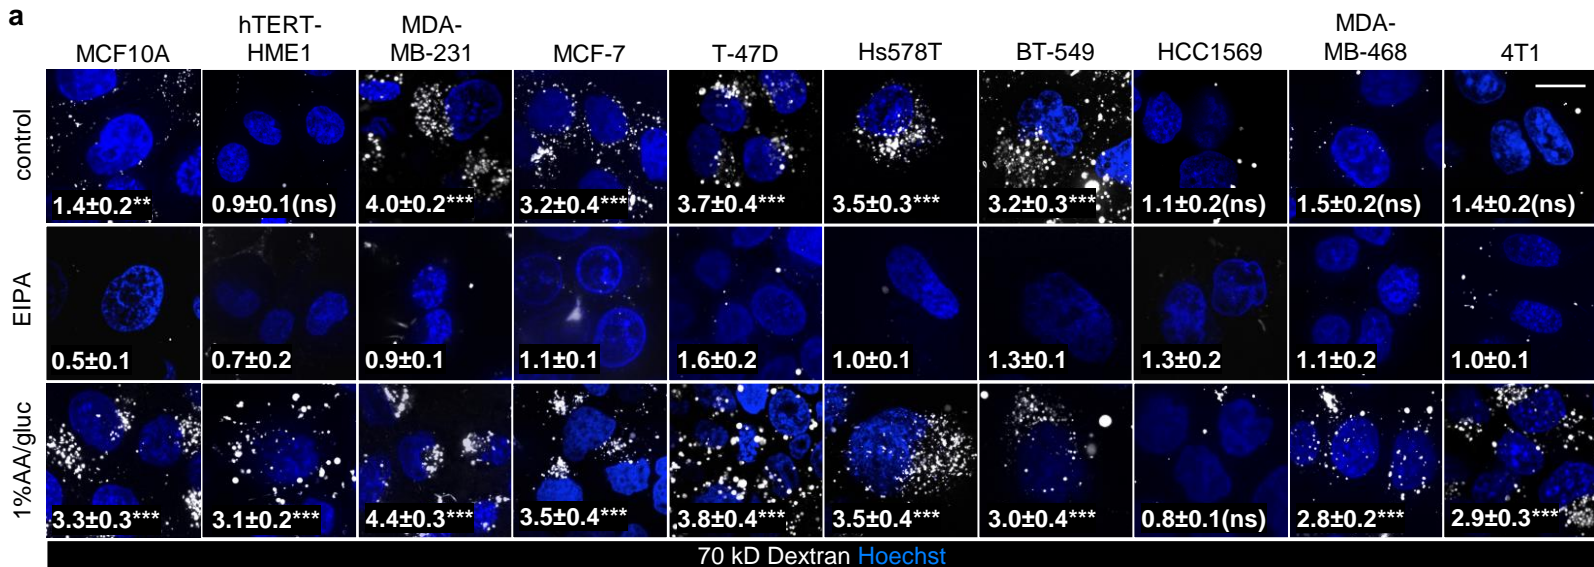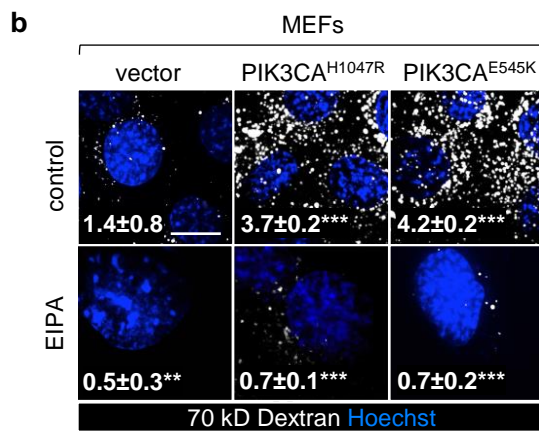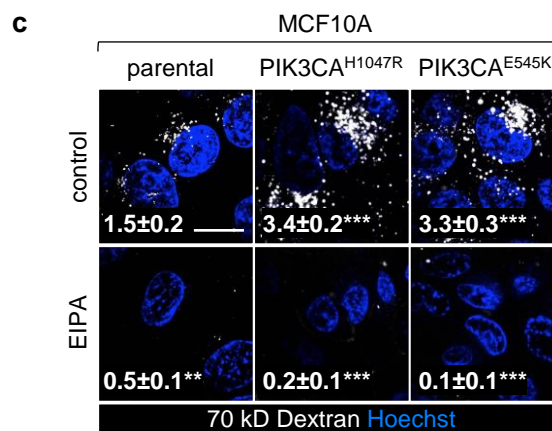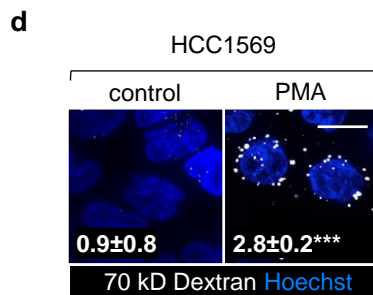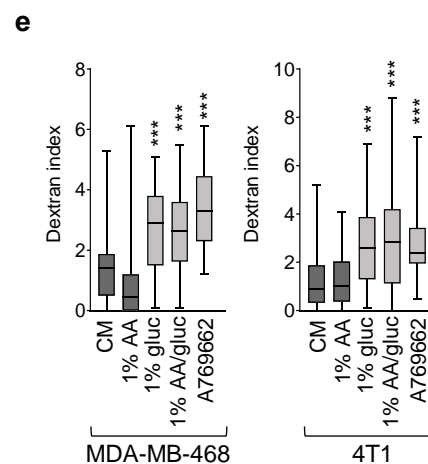

**Supplementary Fig. 1: Cells lines with activating mutations in KRAS or the PI3K pathway exhibit macropinocytosis.** **a** 70 kD dextran uptake in complete medium (CM) or 1% AA/glucose medium ± EIPA (50 μM) in the indicated breast cancer cell lines. Representative images for Fig. 1a. Statistics compare ± EIPA. Using an unpaired, two-tailed t-test, \*\*\*,  $P \leq 0.001$ ; ns, not significant,  $P > 0.05$ . Forty cells were evaluated from three independent experiments except for MCF10-A and hTERT-HME1 cells where two independent experiments were performed. **b** Dextran uptake in CM ± EIPA (50 μM) in MEFs expressing empty vector, PIK3CA<sup>H1047R</sup>, or PIK3CA<sup>E545K</sup>. **c** Dextran uptake in CM ± EIPA (50 μM) in parental MCF10A cells or in PIK3CA<sup>H1047R</sup> or PIK3CA<sup>E545K</sup> knock-in MCF10A cells. In **b,c**, statistics compare dextran index in control cells and with cells PIK3CA mutations (top row) or ± EIPA (bottom row). Using a one-way ANOVA with Dunnett's correction (top row) or an unpaired, two-tailed t-test (bottom row), \*\*,  $P \leq 0.01$  and \*\*\*,  $P \leq 0.001$ ; 50 cells were evaluated from two biological replicates. **d** Dextran uptake in HCC1569 cells ± PMA (250 nM). Statistics compare ± PMA; n=30 from one experiment. Using an unpaired, two-tailed t-test, \*\*\*,  $P \leq 0.001$ . **e** Dextran index in MDA-MB-468 or 4T1 cells maintained in CM, 1% AA, 1% gluc, 1% AA/gluc medium or A769662 (50 μM). Box plots show median at centerline and the 25<sup>th</sup> to 75<sup>th</sup> percentile; whiskers represent minimum and maximum values. N=30 cells from two independent experiments. Using a one-way ANOVA with Dunnett's correction, \*\*\*,  $P \leq 0.001$ ; no asterisk,  $P > 0.05$ . In **b-d**, mean dextran index ± SEM shown in white. Scale bars, 20 μm.

# Supplementary Fig. 2 - Related to Fig. 2

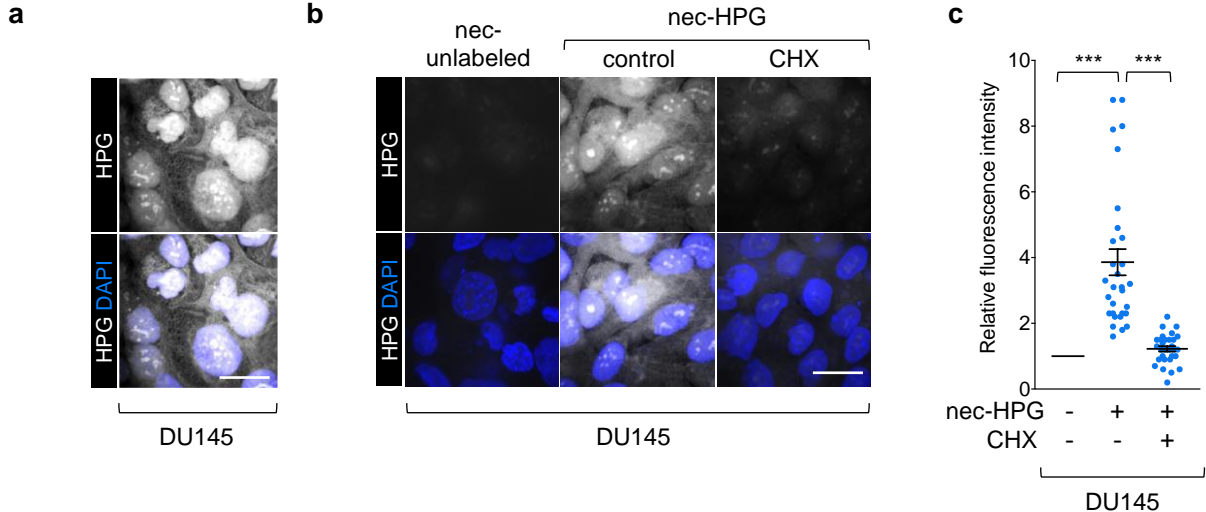

**Supplementary Fig. 2: Necrocytosis supports protein synthesis in nutrient-deprived prostate cancer cells.** **a** DU145 cells were labeled with HPG for 24 h in 1% AA. **b** DU145 cells in 1% AA ± cycloheximide (CHX, 50 µg/ml) were supplied with HPG-labeled necrotic cell debris for 24 h. **c** Integrated fluorescence intensity per cell from panel (b) normalized to cells fed unlabeled necrotic debris. A total of 50 cells were quantified from 1 experiment; mean ± SEM shown. Using a one-way ANOVA with Tukey's correction, \*\*\*,  $P \leq 0.001$ . Scale bar, 20 µm.

# Supplementary Fig. 3 – Related to Fig. 2

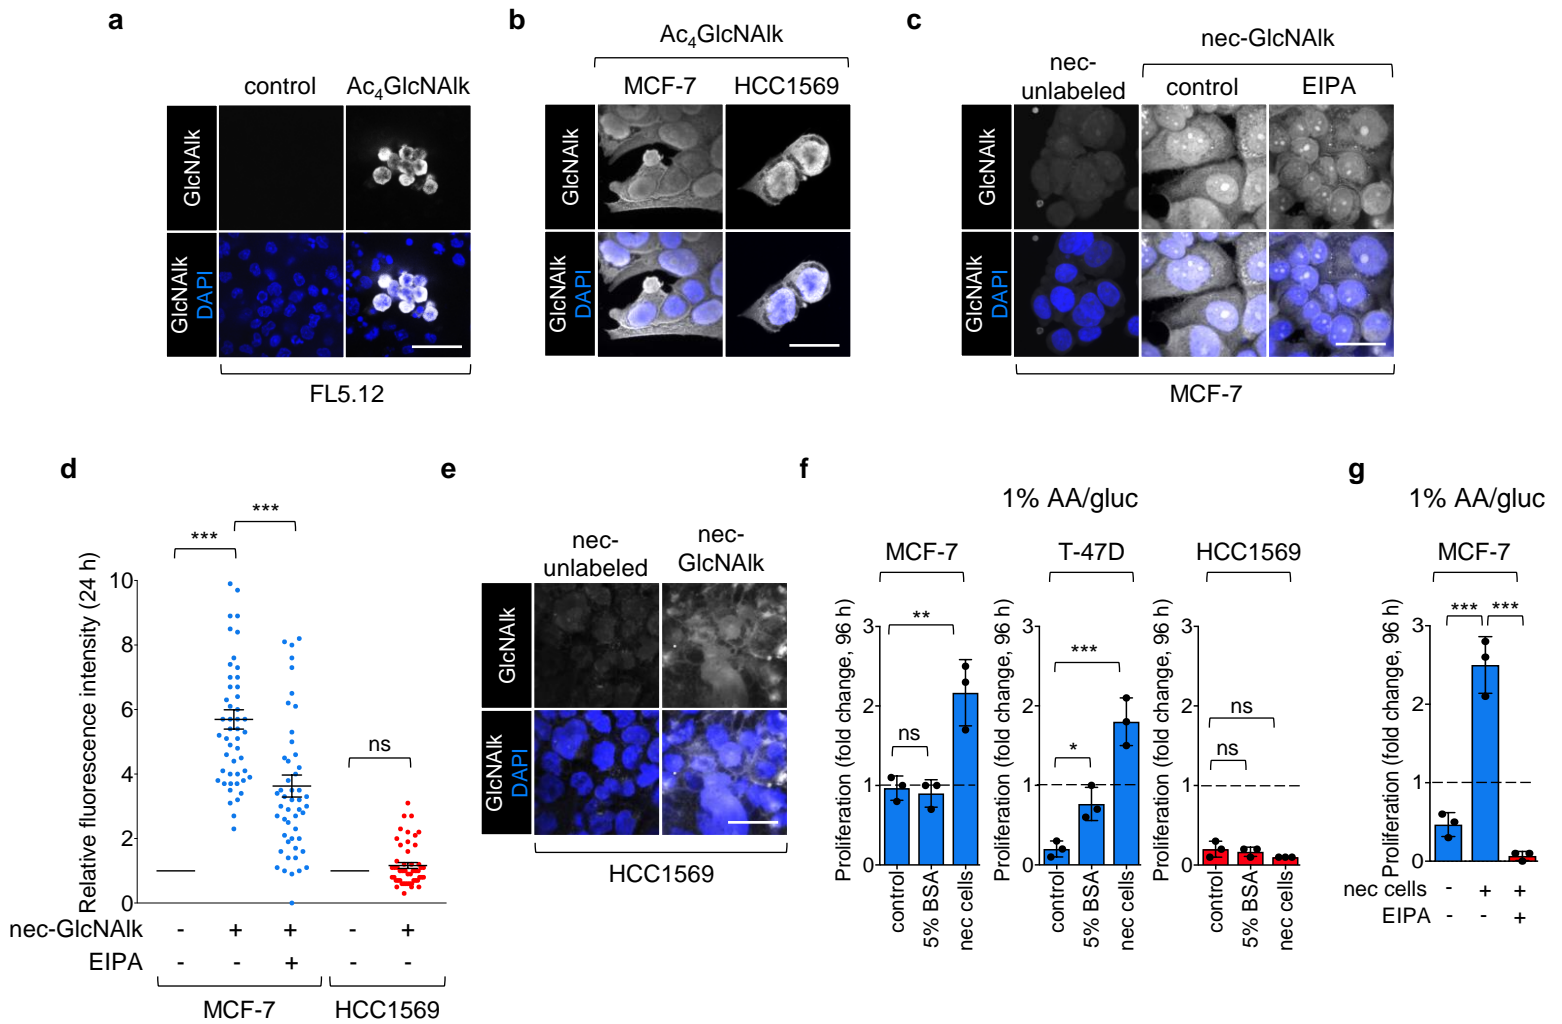

**Supplementary Fig. 3: Macropinocytic breast cancer cells scavenge sugars via necrocytosis.** **a** FL5.12 cells labeled with Ac<sub>4</sub>GlcNAik in complete medium for 24 h; GlcNAik detected with biotin-azide and Alexa488-streptavidin. **b** MCF-7 and HCC1569 cells were labeled as in **(a)** but in 1% AA medium. **c** Macropinocytic MCF-7 cells ± EIPA (50 μM) maintained in 1% AA medium for 24 h with unlabeled or GlcNAik-labeled necrotic cell debris (nec-GlcNAik). **d** Integrated fluorescence intensity per cell in **(c,e)** normalized to cells fed unlabeled necrotic cell debris. For each condition, 50 cells were examined from two independent experiments. Mean ± SEM shown. Using a one-way ANOVA and Tukey's correction (MCF-7) or an unpaired, two-tailed t-test (HCC1569), \*\*\*,  $P \leq 0.001$ ; ns, not significant,  $P > 0.05$ . **e** As in **(c)**, but with non-macropinocytic HCC1569 cells. **f** Proliferation of macropinocytic MCF-7 and T-47D cells or non-macropinocytic HCC1569 cells in 1% AA/gluc medium supplemented with fatty acid-free albumin (5%) or necrotic debris (0.2% protein). **g** MCF-7 cells as in **(f)** but treated with EIPA (25 μM). For **f** and **g**, mean ± SD shown,  $n=3$ . Using a one-way ANOVA and Dunnett's **(f)** or Tukey's correction **(g)**, \*,  $P \leq 0.05$ ; \*\*\*,  $P \leq 0.001$ ; ns, not significant,  $P > 0.05$ . Scale bars, 20 μm.

## Supplementary Fig. 4 - Related to Fig. 3

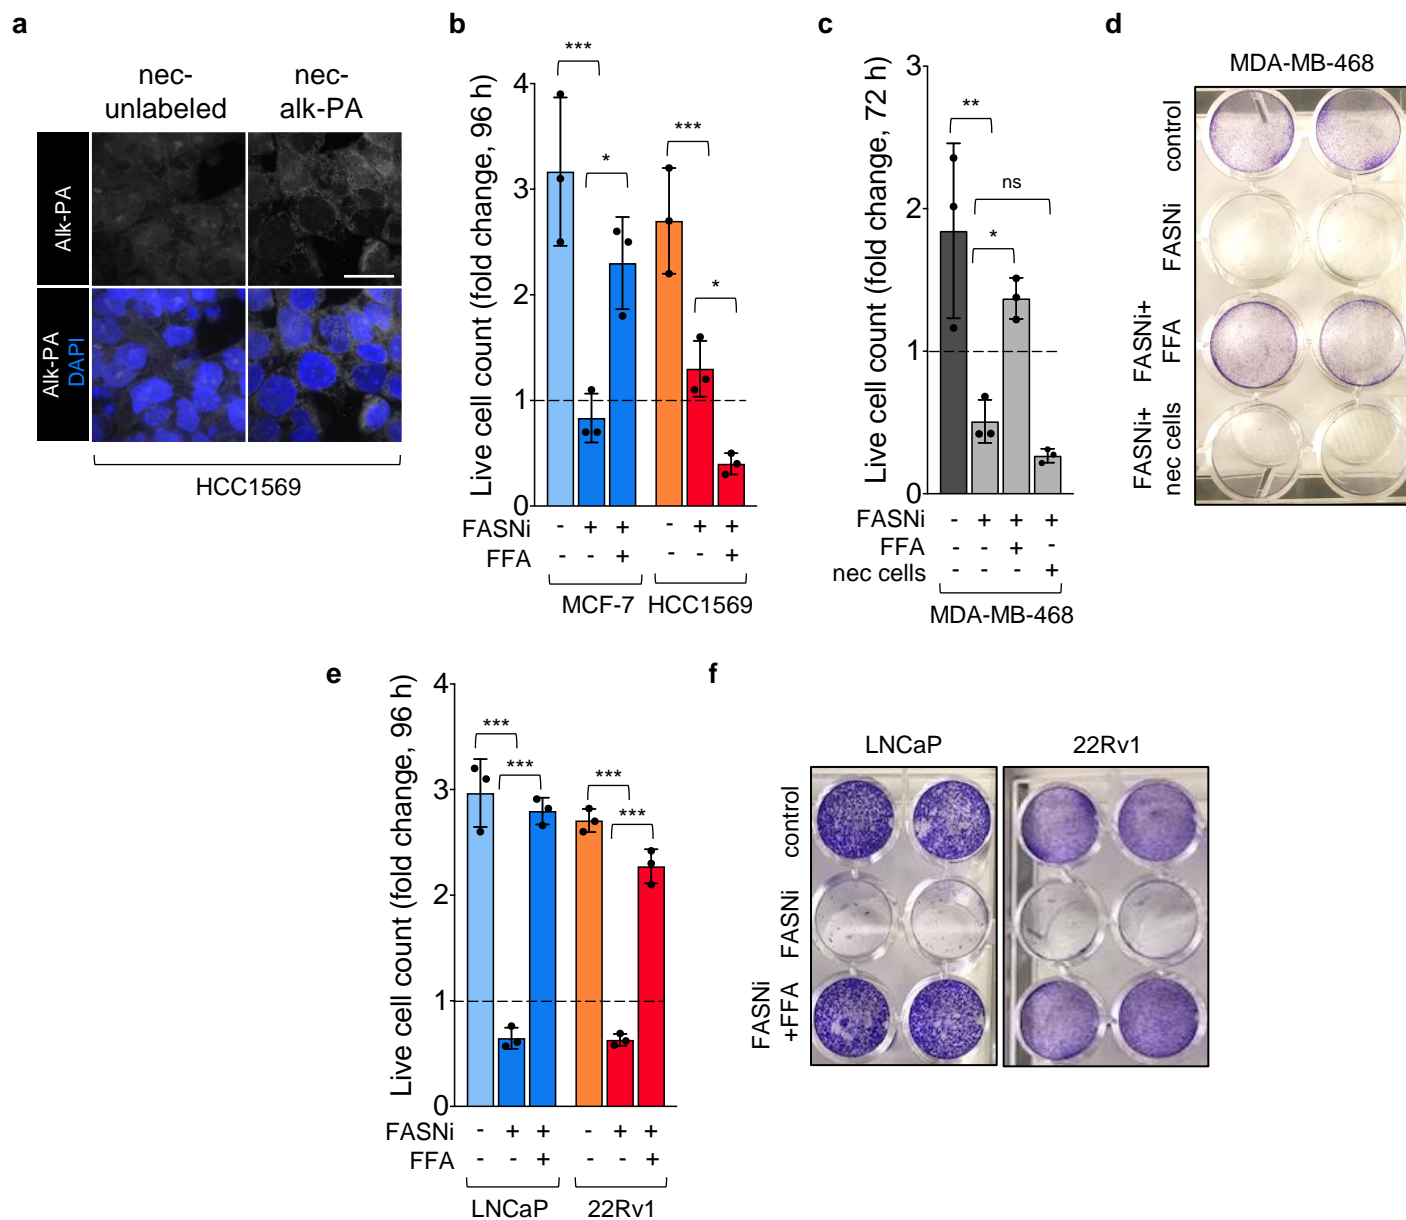

**Supplementary Fig. 4: Free fatty acids rescue both non-macropinocytic and macropinocytic cells from fatty acid synthase inhibition.** **a** HCC1569 cells supplemented with unlabeled or alk-PA-labeled necrotic cell debris (nec-alk-PA) and stained with streptavidin-Alexa488. Scale bar, 20  $\mu$ m. **b** Proliferation of macropinocytic MCF-7 or non-macropinocytic HCC1569 cells in complete medium  $\pm$  FASNi (GSK2194069, 20  $\mu$ M)  $\pm$  linoleic and oleic acid supplementation (1 mg/ml). **c** Proliferation of MDA-MB-468 breast cancer cells as in (b). MDA-MB-468 cells are not macropinocytic in complete medium. **d** Representative plate for **c** (duplicate wells shown). **e** As in (b), but using macropinocytic (LNCaP) or non-macropinocytic (22Rv1) prostate cancer cells. **f** Representative plate for **e**. In **b**, **c** and **e**, mean  $\pm$  SD shown, n=3. Using a one-way ANOVA and Tukey's correction, \*,  $P \leq 0.05$ ; \*\*,  $P \leq 0.01$ ; \*\*\*,  $P \leq 0.001$ ; ns, not significant,  $P > 0.05$ .

# Supplementary Fig. 5 - Related to Fig. 5

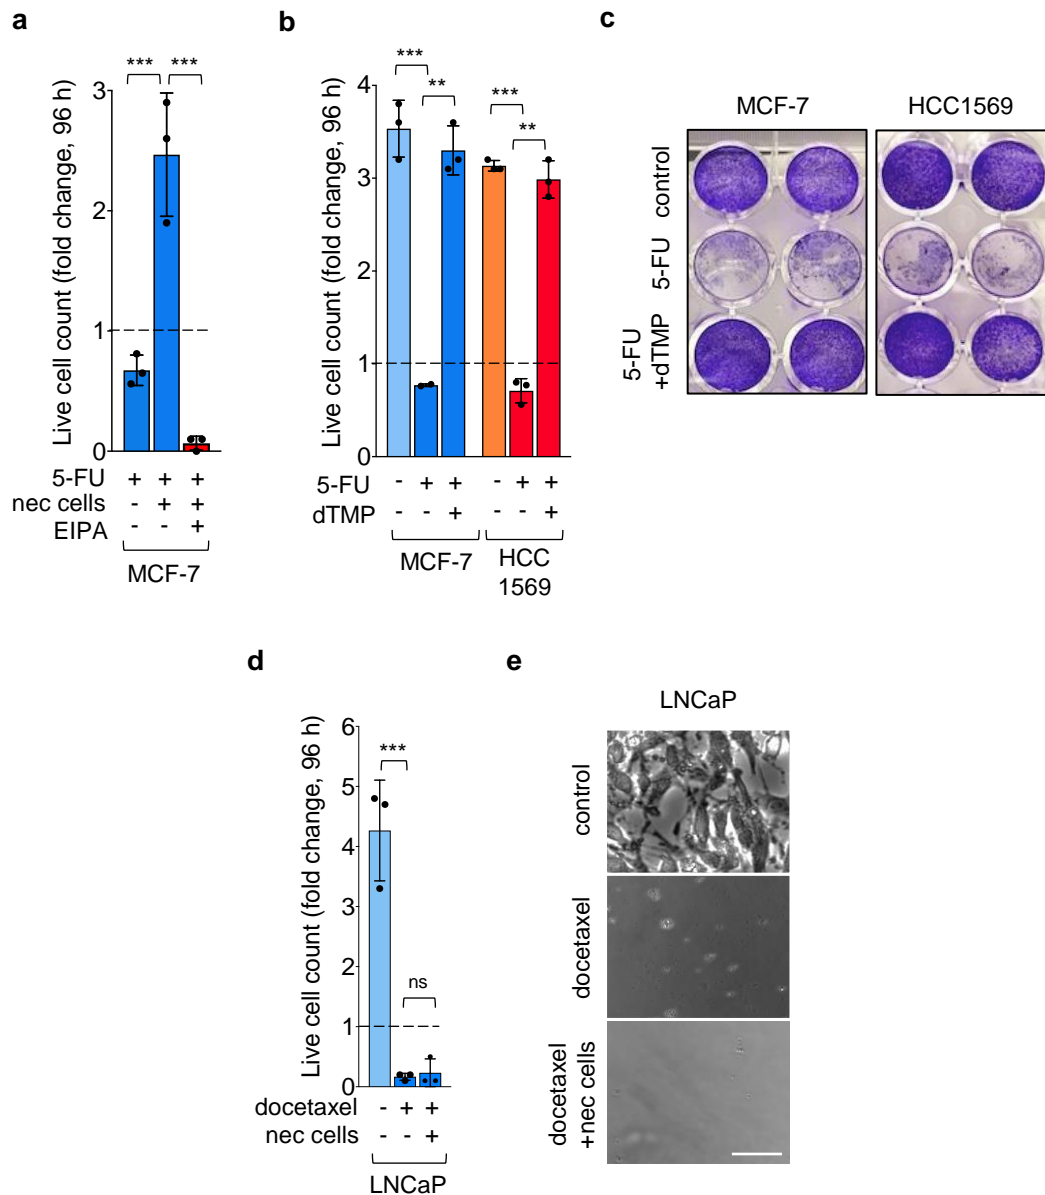

**Supplementary Fig. 5: Necrocytosis and nucleotide precursors protect from nucleotide synthesis inhibitors. a** Proliferation of macropinocytic MCF-7  $\pm$  5-FU (30  $\mu$ M)  $\pm$  necrotic debris (0.2% protein)  $\pm$  EIPA (25  $\mu$ M) at 96 h. **b** Proliferation of macropinocytic MCF-7 or non-macropinocytic HCC1569 cells  $\pm$  5-FU (30  $\mu$ M)  $\pm$  necrotic debris (0.2% protein)  $\pm$  deoxythymidine monophosphate (dTMP, 1  $\mu$ M) at 96 h. **c** Representative plate from (b). **d** Proliferation of macropinocytic LNCaP cells  $\pm$  docetaxel (5  $\mu$ M)  $\pm$  necrotic debris (0.2% protein) at 96 h. **e** Representative bright field images from (d). In **a**, **b**, and **d**, mean  $\pm$  SD shown, n=3. Using a one-way ANOVA and Tukey's correction, \*\*,  $P \leq 0.01$ ; \*\*\*,  $P \leq 0.001$ ; ns, not significant,  $P > 0.05$ . Scale bar, 10  $\mu$ m



## Supplementary Fig. 6 - Related to Fig. 6

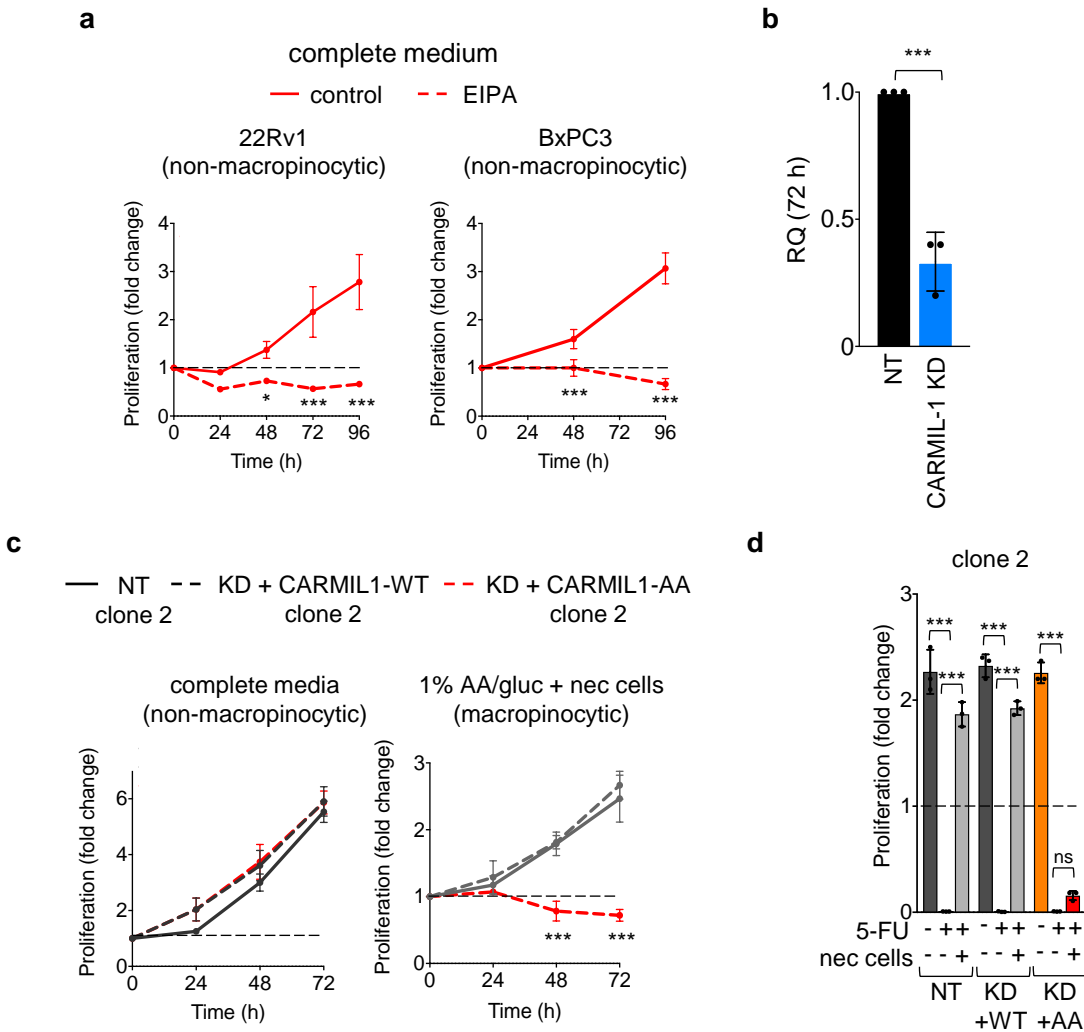

**Supplementary Fig. 6: CARMIL1-AA supports normal proliferation, but not macropinocytosis.** **a** Proliferation of non-macropinocytic prostate cancer (22Rv1) or pancreas cancer (BxPC3) cells  $\pm$  EIPA (25  $\mu$ M). Using unpaired two-tailed t-tests at each time point, \*,  $P \leq 0.05$ ; \*\*\*,  $P \leq 0.001$ ; no asterisk,  $P > 0.05$ ; mean  $\pm$  SEM. **b** mRNA levels 72 h post shRNA-mediated knockdown of CARMIL-1 in 4T1 cells, normalized to GAPDH levels. Mean  $\pm$  SD shown. Using an unpaired, two-tailed t-test, \*\*\*,  $P \leq 0.001$ . **c** Proliferation of second clones of contextually macropinocytic 4T1 cells expressing a non-targeting (NT) shRNA or CARMIL1 shRNA (KD) and reconstituted with shRNA-resistant CARMIL1-WT or CARMIL1-AA cDNAs. Assay performed in complete medium or in 1% AA/glucose medium supplemented with necrotic debris (0.2% protein). Using a one-way ANOVA at each time point and Dunnett's correction, \*\*\*,  $P \leq 0.001$ ; no asterisk,  $P > 0.05$ ; mean  $\pm$  SEM. **d** As in (c), but cells were maintained in complete medium  $\pm$  5-FU (1  $\mu$ M)  $\pm$  necrotic debris (0.2% protein) and proliferation measured at 72 h. Mean  $\pm$  SEM. Using a one-way ANOVA and Tukey's correction, \*\*\*,  $P \leq 0.001$ ; ns, not significant,  $P > 0.05$ . For **a-d**, results are derived from three independent experiments.

# Supplementary Fig. 7 - Related to Fig. 7

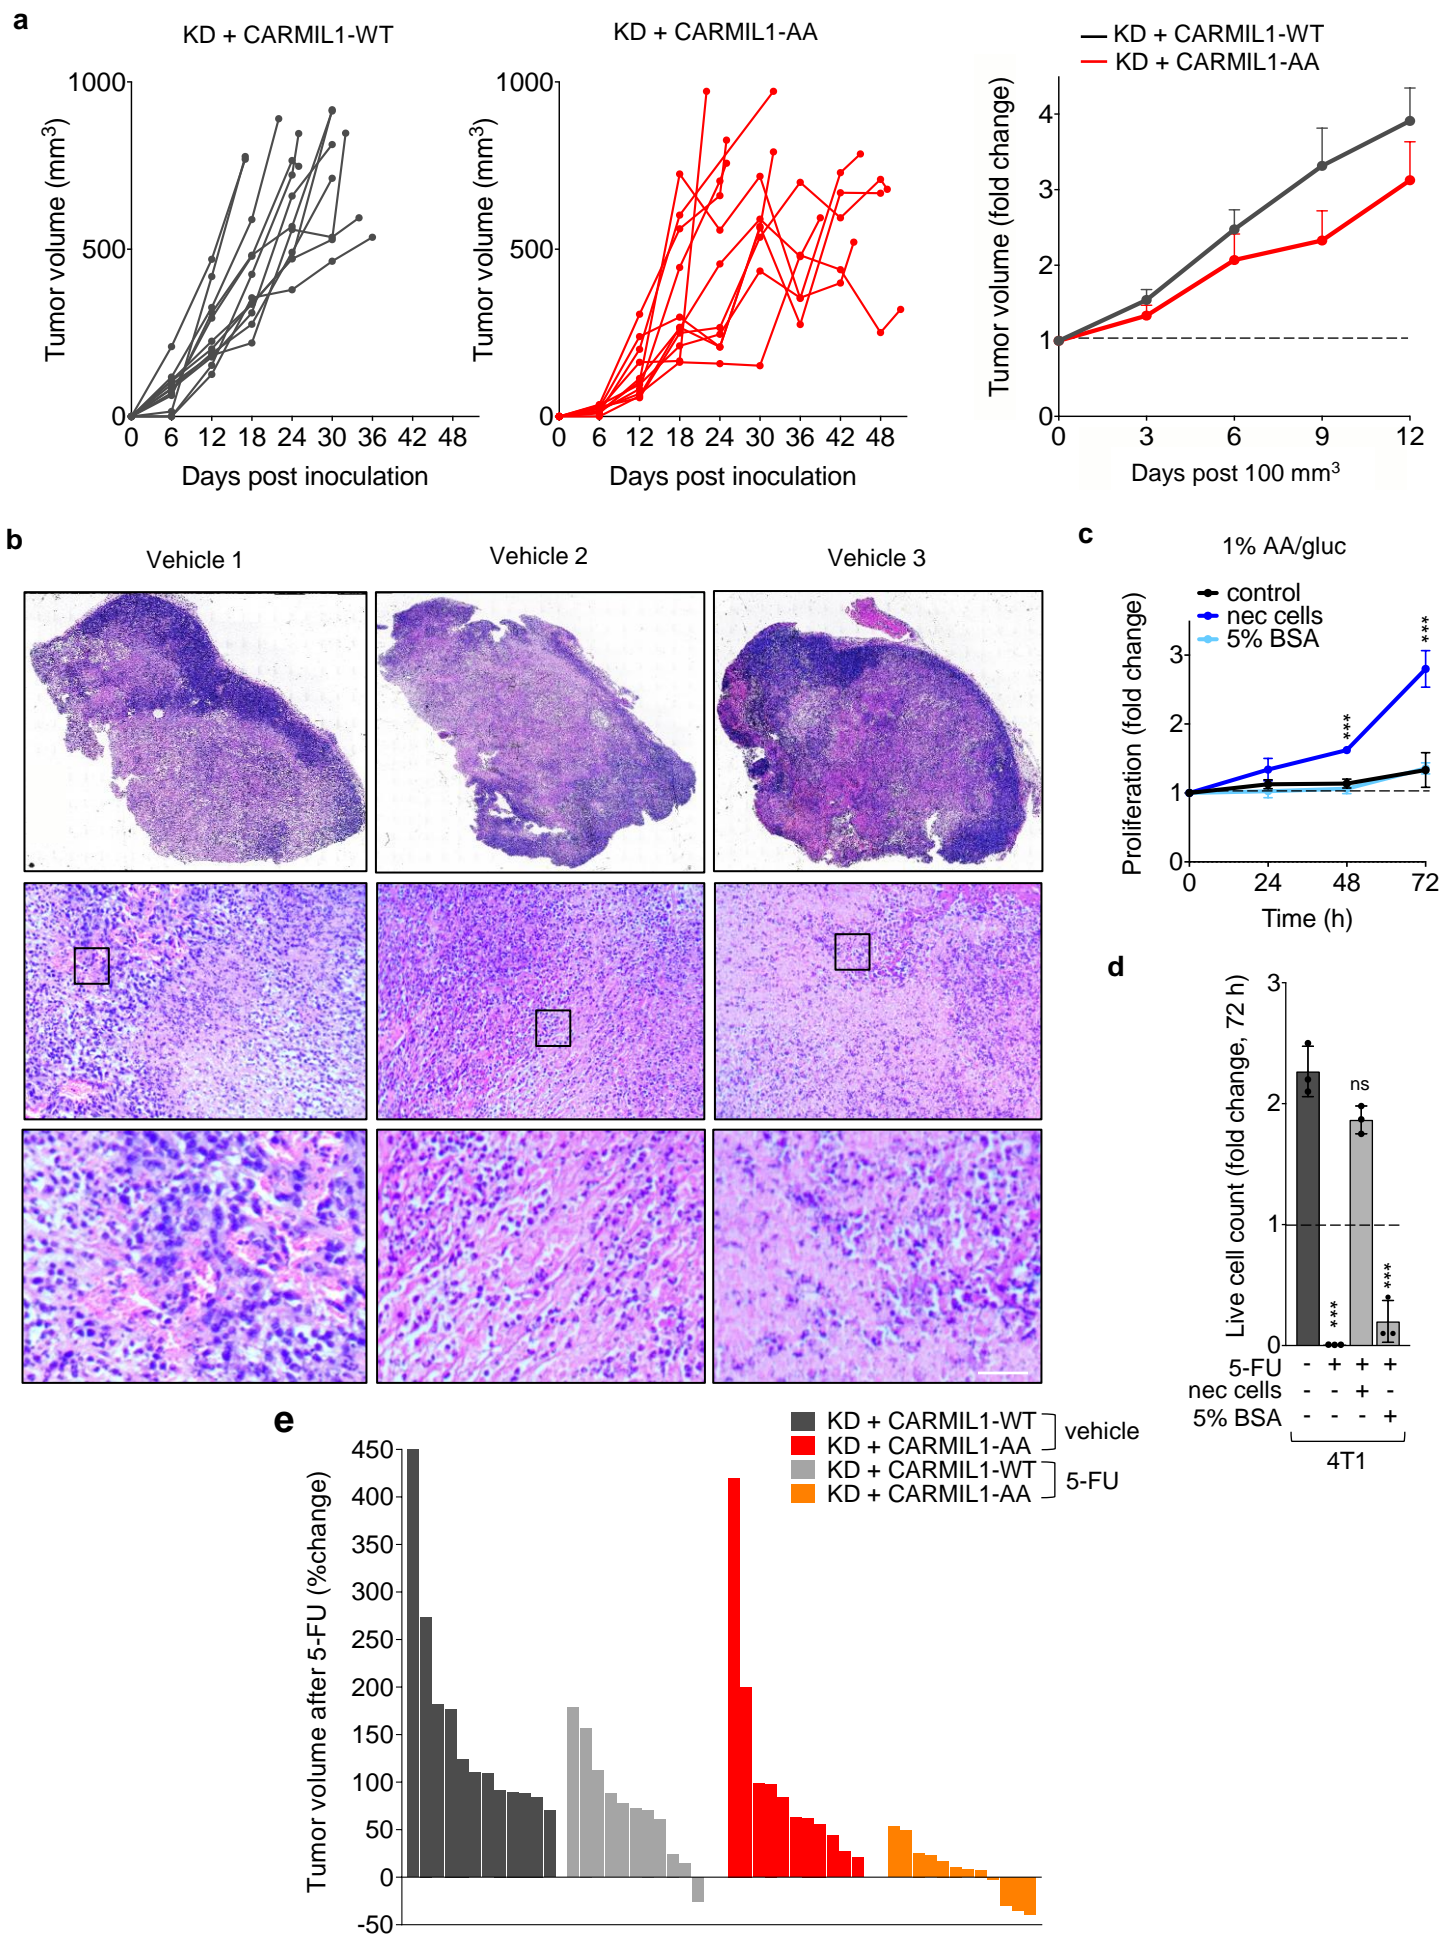



**Supplementary Fig. 7: Necrocytosis fuels 5-FU resistance in vivo.** **a** Volume of individual CARMIL1-WT (n=12) or CARMIL1-AA (n=11) tumors. Average growth  $\pm$  SEM (right panel). Using unpaired, two-tailed t-tests, the difference in average tumor volume (right panel) was not significant at any time point ( $P > 0.05$ ). **b** H&E staining of three, representative CARMIL1-WT tumors. Tumors estimated to be 70-80% necrotic. Pairwise stitching of 20 X 20 individual frames obtained at a 10X magnification was performed using Zen 2.3 software to produce images of the entire tumor section (top row). Images were also taken at 10X magnification (middle row); a digitally zoomed image is also shown for each tumor (bottom row). Scale bar, 10  $\mu$ m **c** Proliferation of 4T1 cells maintained in 1% AA/gluc + necrotic debris (0.2% protein) or 5% BSA. Mean  $\pm$  SD shown, n=3. Using a one-way ANOVA at each time point and Dunnett's correction, \*\*\*,  $P \leq 0.001$ ; no asterisk,  $P > 0.05$ . **d** Proliferation of 4T1 cells maintained in complete medium  $\pm$  5-FU (1  $\mu$ M)  $\pm$  necrotic debris (0.2% protein) or BSA (5%) at 72 h. Mean  $\pm$  SD shown, n=3. Using a one-way ANOVA and Dunnett's correction, \*\*\*,  $P \leq 0.001$ ; ns, not significant,  $P > 0.05$ . **e** Change in tumor volume after 6 days of treatment with vehicle or 5-FU.

## Supplementary Fig. 8

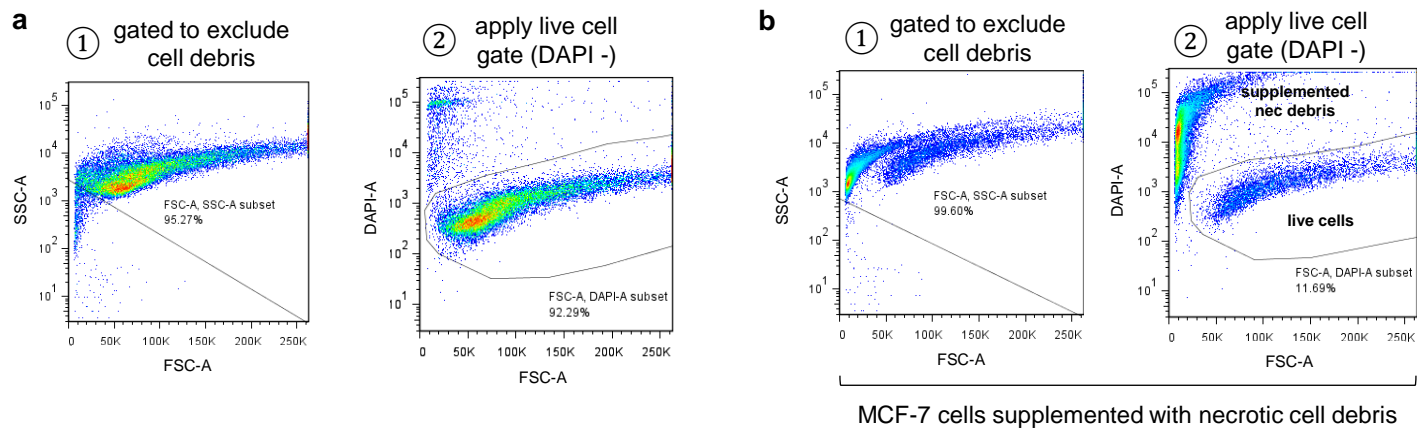

**Supplementary Fig. 8: Flow cytometry gating strategy for proliferation assays.** **a** Cell debris was excluded using a FSC/SSC dot plot. DAPI negative events were considered live cells. **b** A similar strategy was used where cells were supplemented with necrotic debris. The number of live cells collected in 30 sec was used to monitor proliferation.
